# Supplementary material
Source: publisher figshare collection journal article supplement (https://tandf.figshare.com/ndownloader/files/15460142)
Supplement: Supplementary file 1 [file 15460142]

**SUPPLEMENTARY MATERIAL**

**List of Figure:**

Fig. S1: 1H-NMR (400 MHz, pyridine-*d*5) Spectrum of Compound **1**.

Fig. S2: 13C-NMR (100 MHz, pyridine-*d*5) Spectrum of Compound **1**.

Fig. S3: HSQC Spectrum of Compound **1**.

Fig. S4: HMBC Spectrum of Compound **1**.

Fig. S5: COSY Spectrum of Compound **1**.

Fig. S6: ROESY (400 MHz) Spectrum of Compound **1**.

Fig. S7: HR-ESI-MS Spectrum of compound **1**.

Fig. S8: 1H-NMR (400 MHz, pyridine-*d*5) Spectrum of Compound **2**.

Fig. S9: 13C-NMR (100 MHz, pyridine-*d*5) Spectrum of Compound **2**.

Fig. S10: HSQC Spectrum of Compound **2**.

Fig. S11: HMBC Spectrum of Compound **2**.

Fig. S12: COSY Spectrum of Compound **2**.

Fig. S13: ROESY (400 MHz) Spectrum of Compound **2**.

Fig. S14: HR-ESI-MS Spectrum of compound **2**.


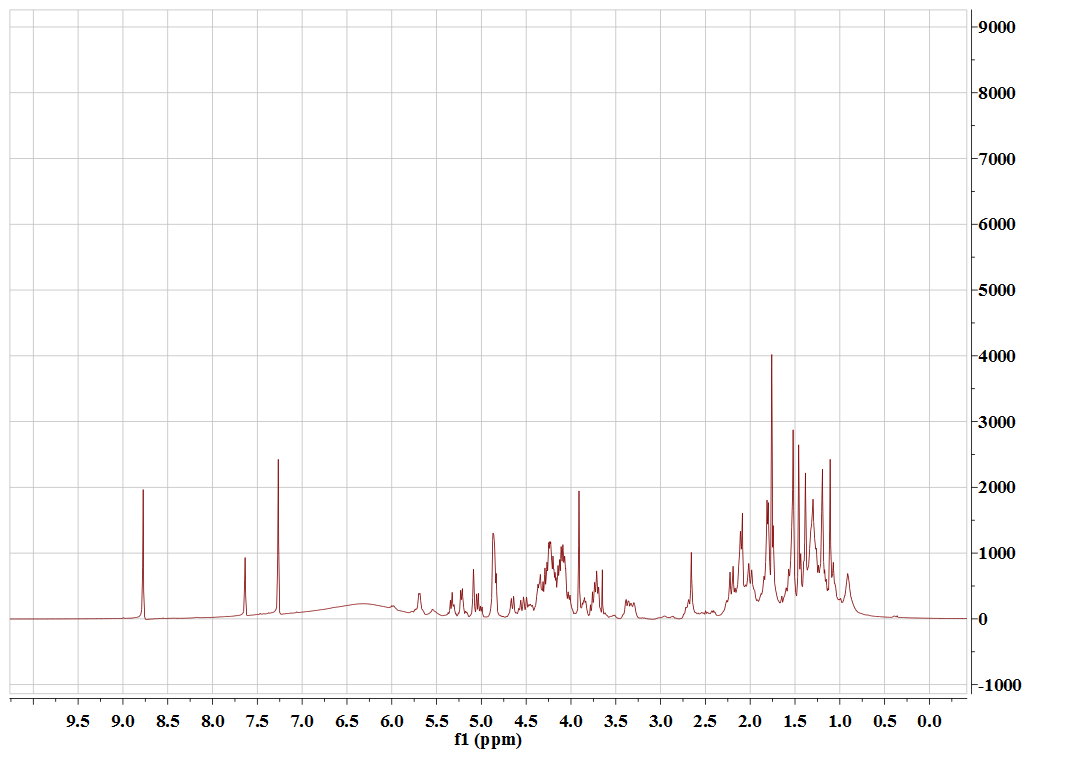


Fig. S1: 1H-NMR (400 MHz, pyridine-*d*5) Spectrum of Compound **1**.


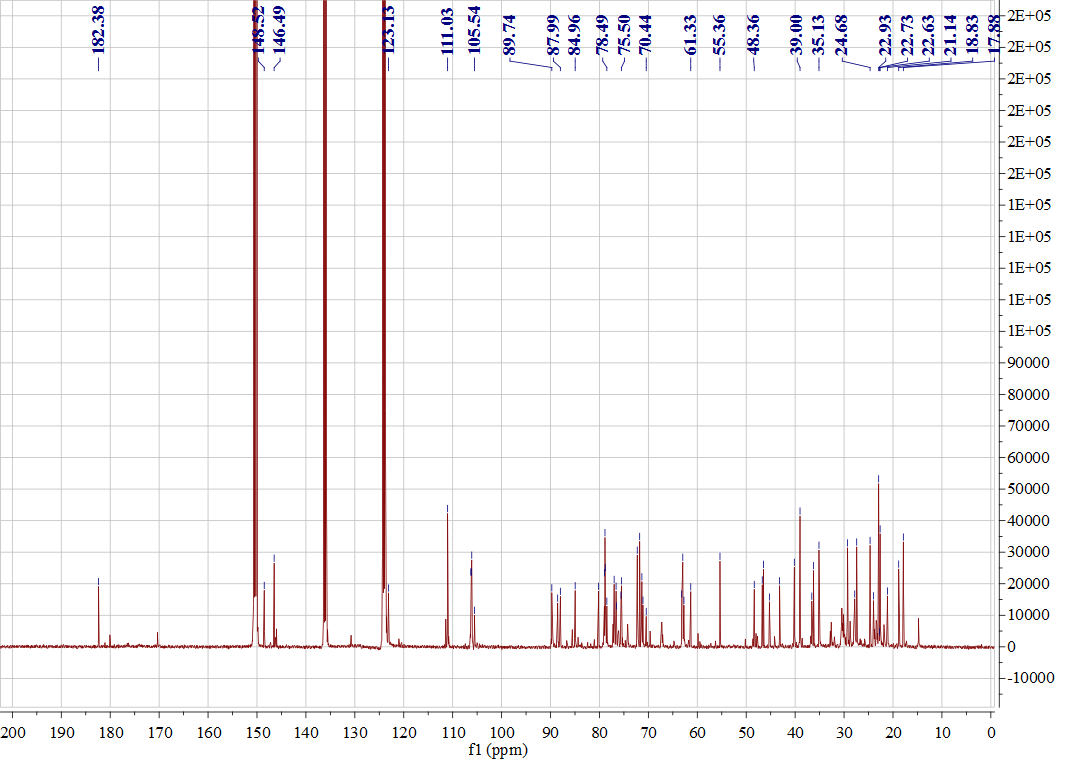


Fig. S2: 13C-NMR (100 MHz, pyridine-*d*5) Spectrum of Compound **1**.


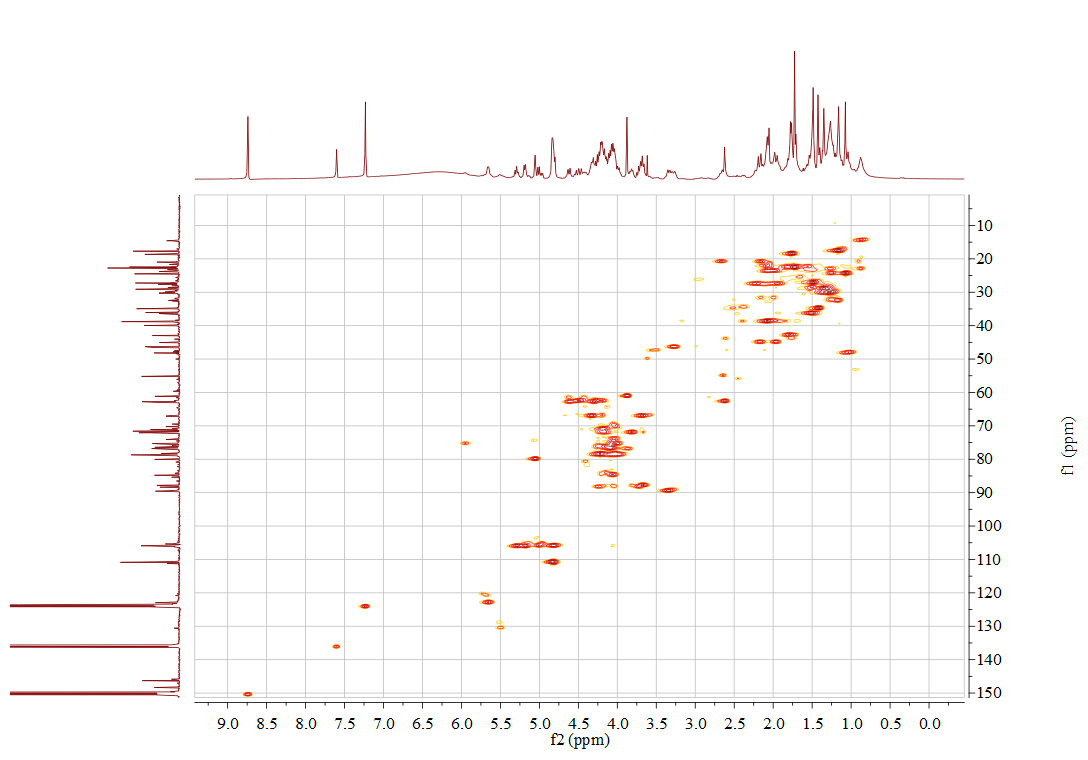


Fig. S3: HSQC Spectrum of Compound **1**.


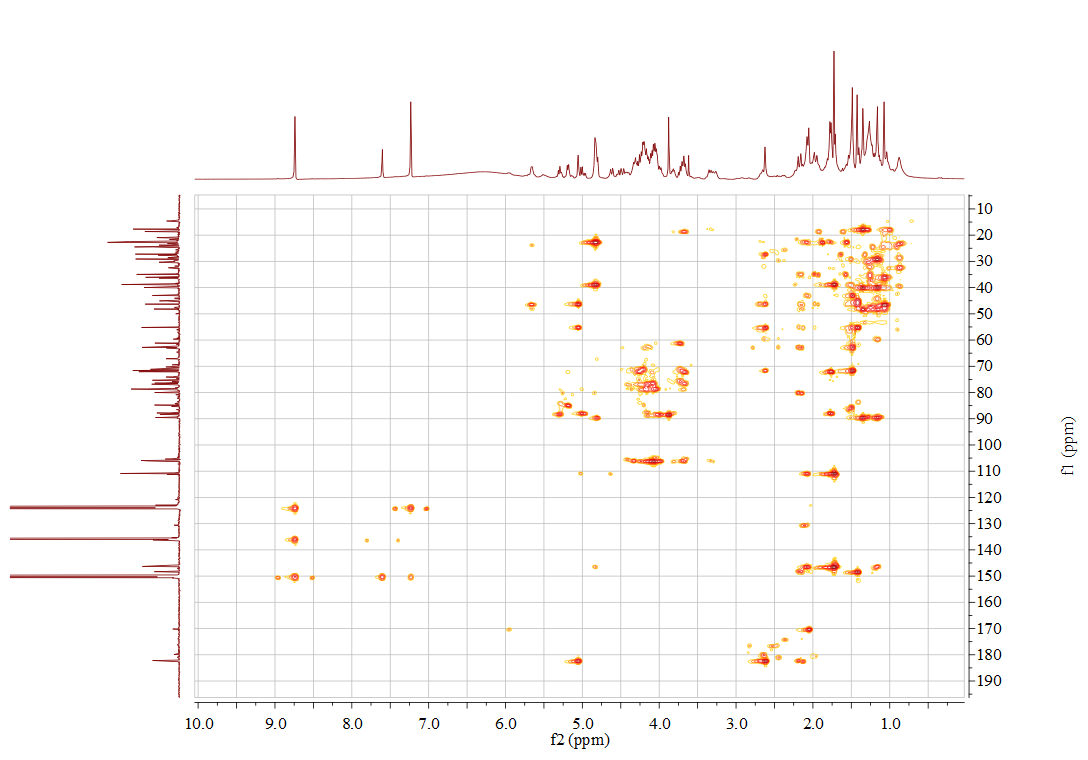


Fig. S4: HMBC Spectrum of Compound **1**.


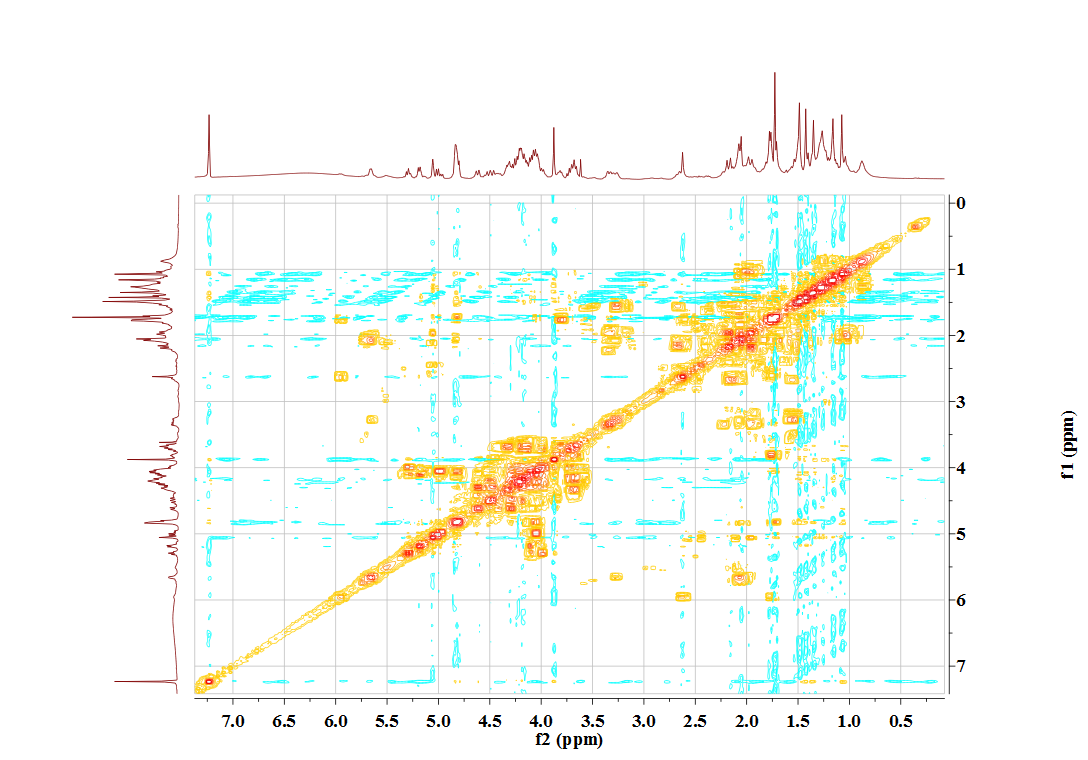


Fig. S5: COSY Spectrum of Compound **1**.

**
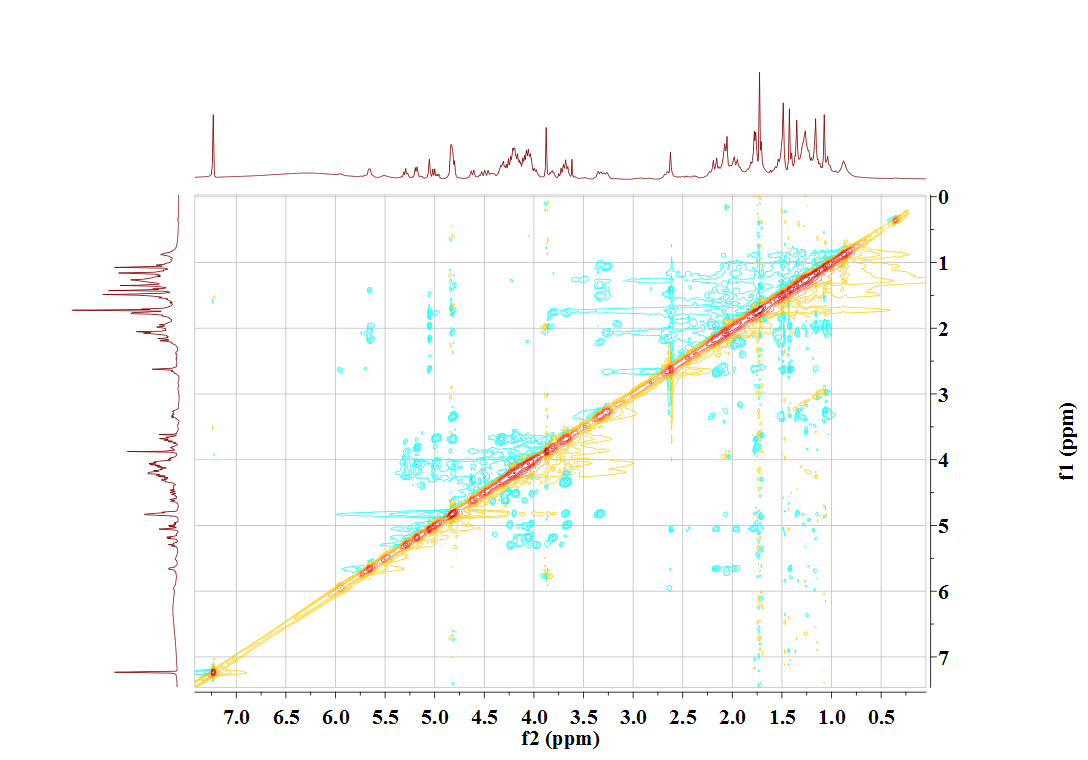
**

Fig. S6: ROESY (400 MHz) Spectrum of Compound **1**.

**
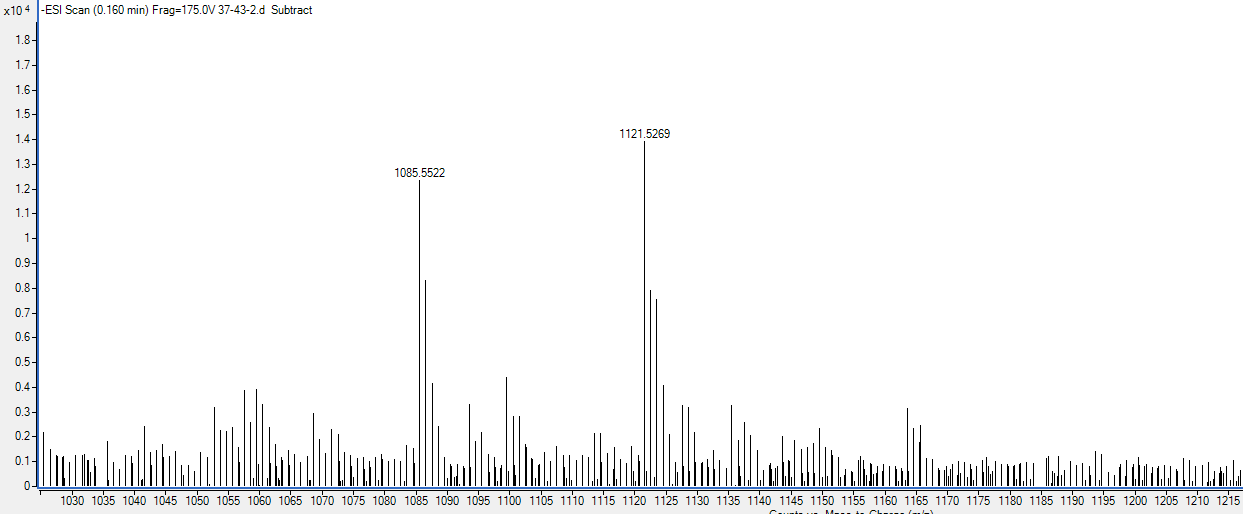
**

Fig. S7: HR-ESI-MS Spectrum of compound **1**.

**
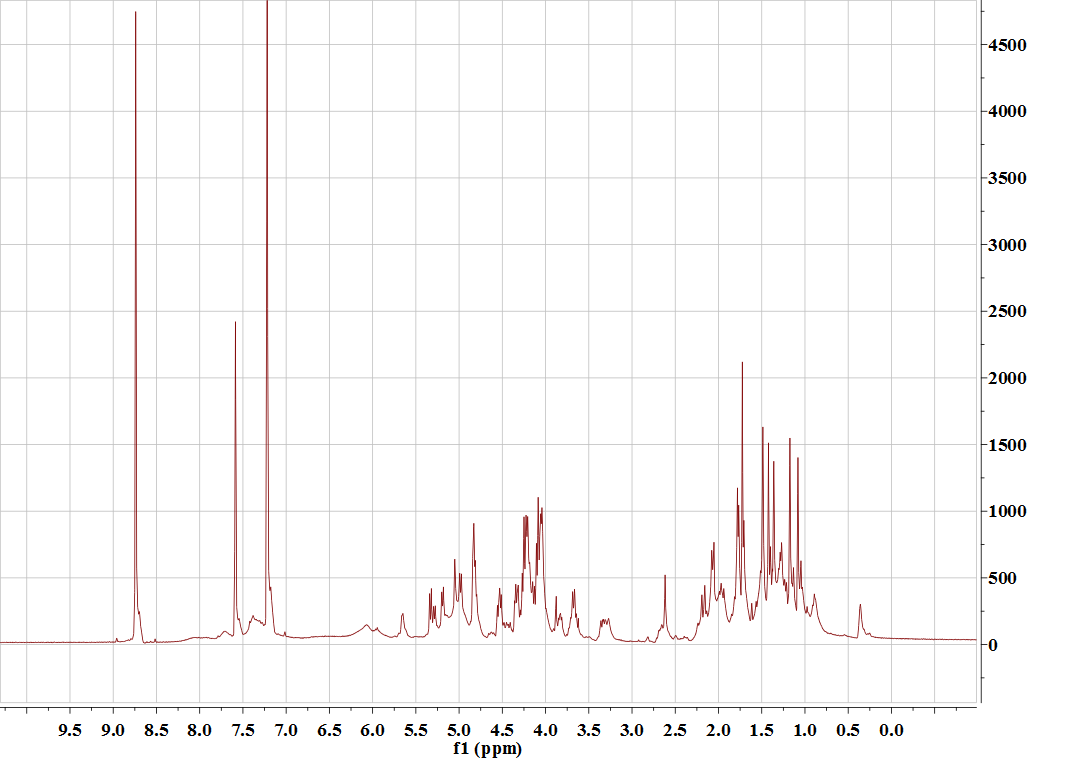
**

Fig. S8 1H-NMR (400 MHz, pyridine-*d*5) Spectrum of Compound **2**


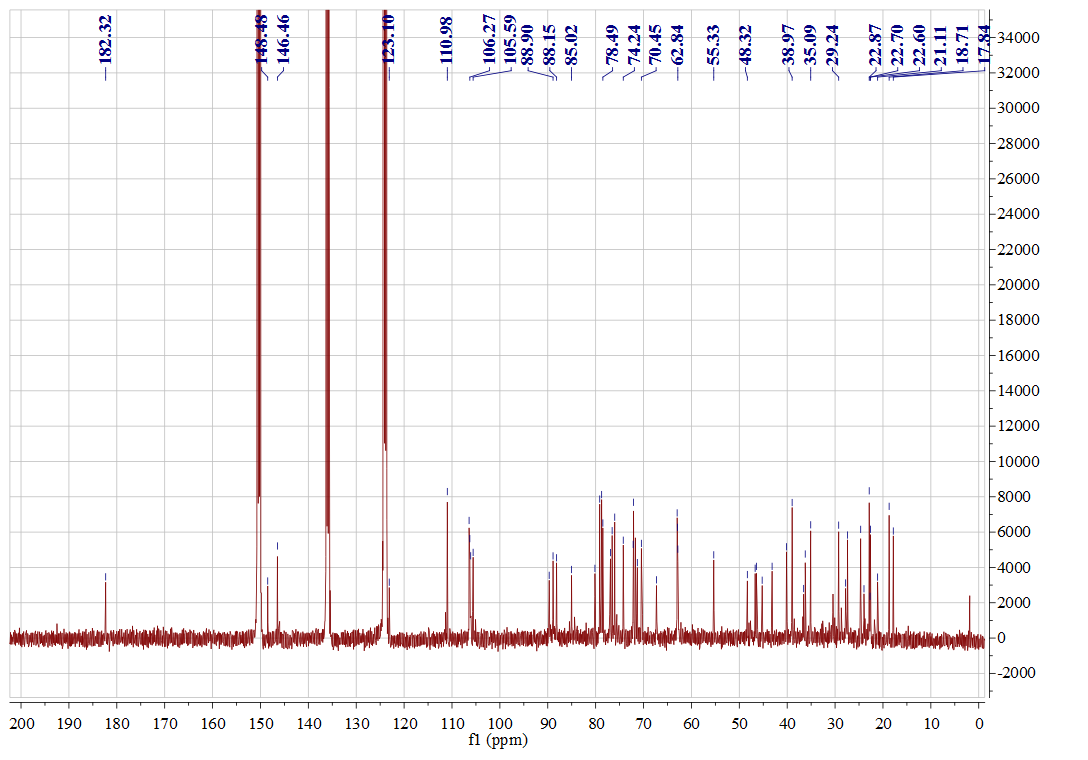


Fig. S9 13C-NMR (100 MHz, pyridine-*d*5) Spectrum of Compound **2**

**
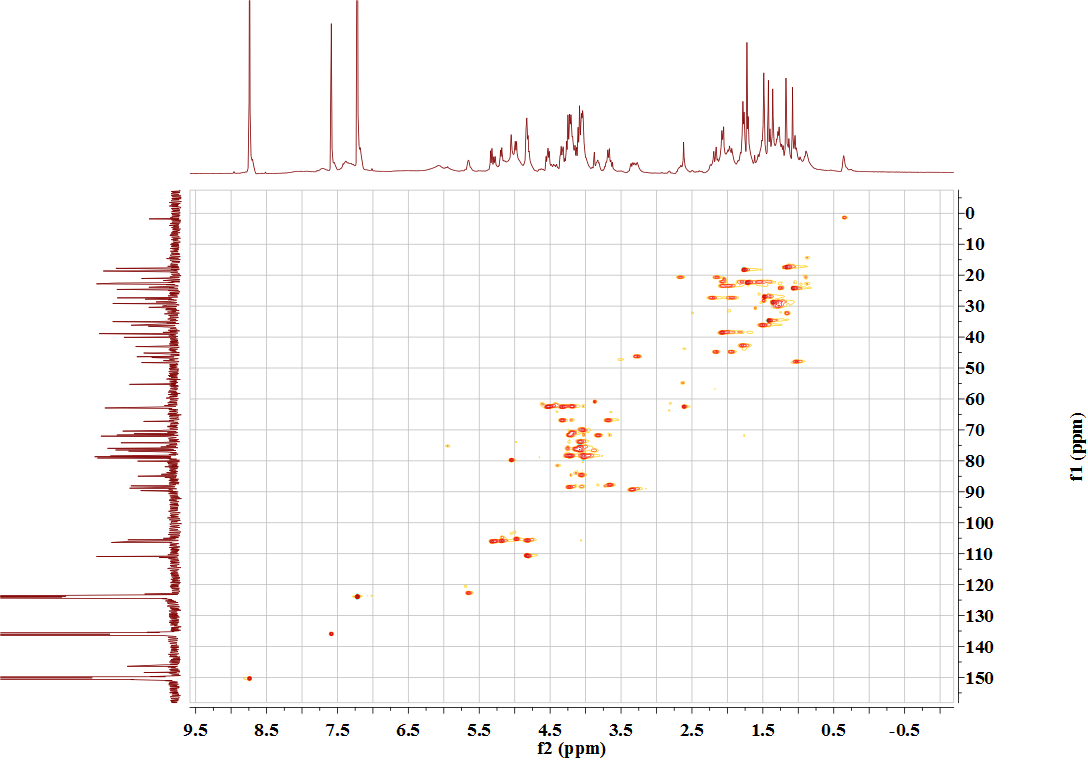
**

Fig. S10 HSQC Spectrum of Compound **2**

**
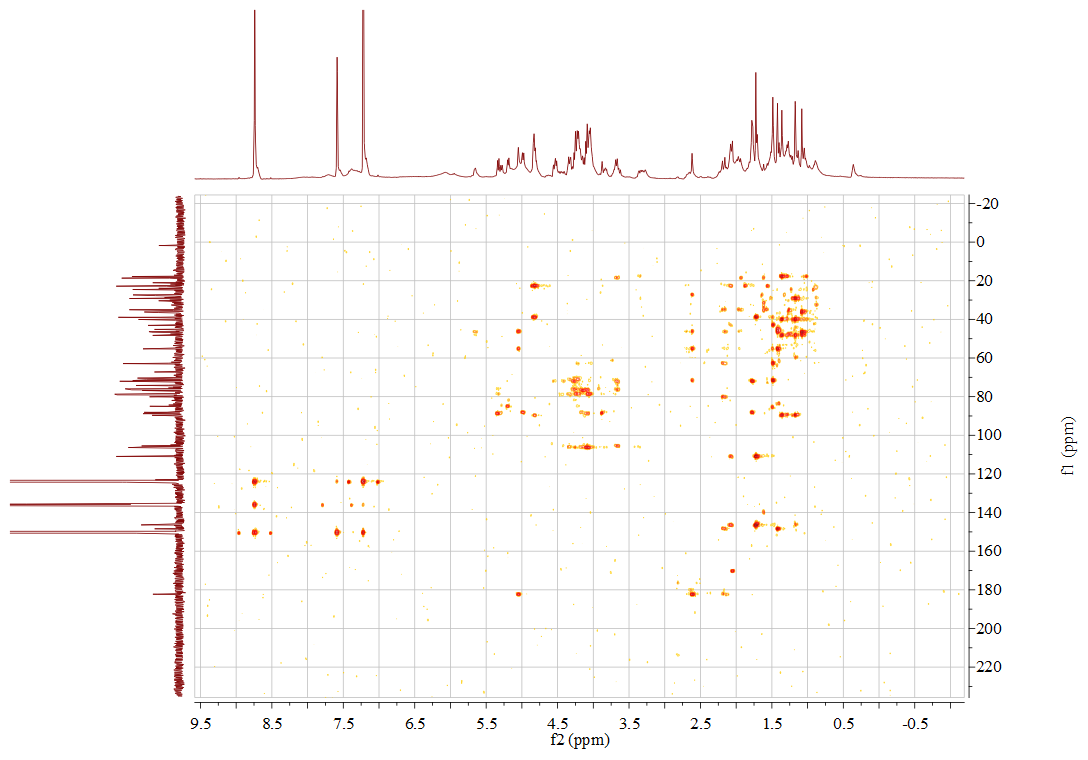
**

Fig. S11 HMBC Spectrum of Compound **2**


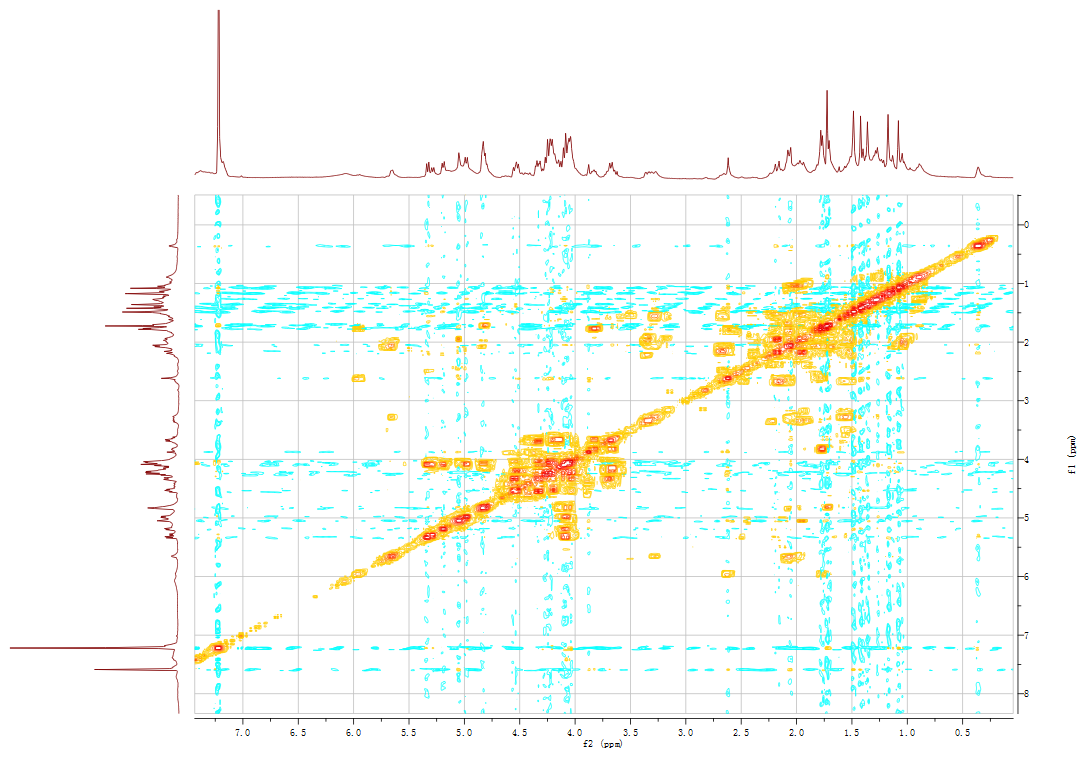


Fig. S12 COSY Spectrum of Compound **2**


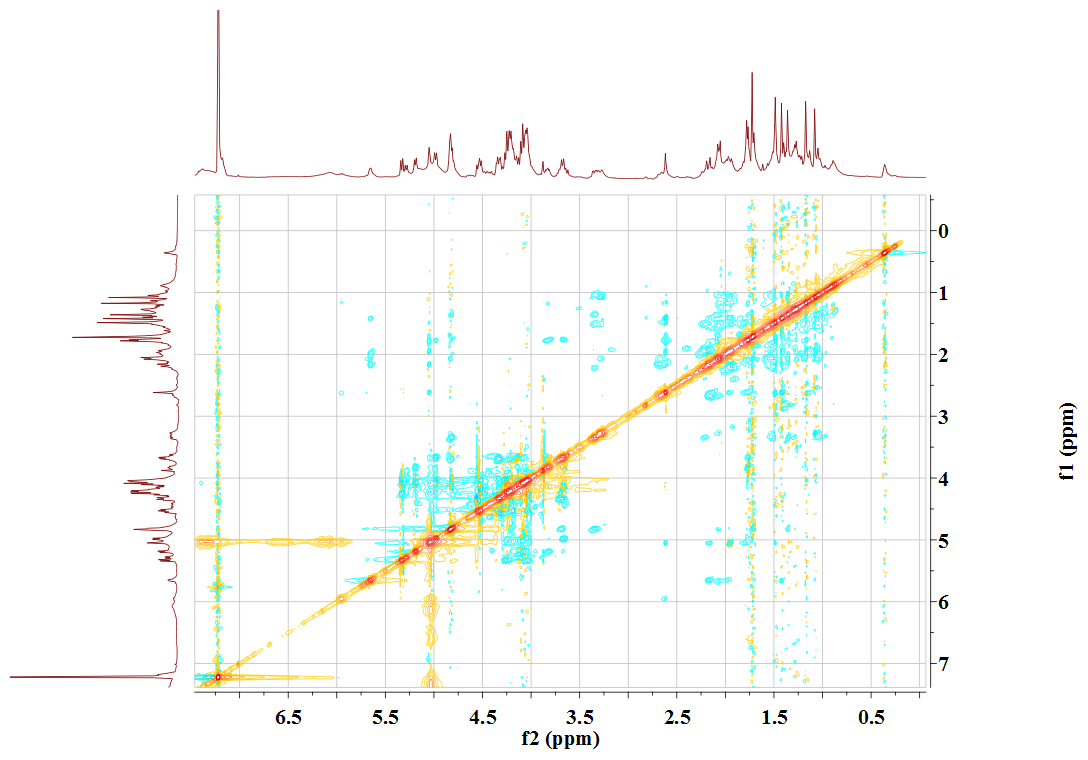


Fig. S13 ROESY (400 MHz) Spectrum of Compound **2**


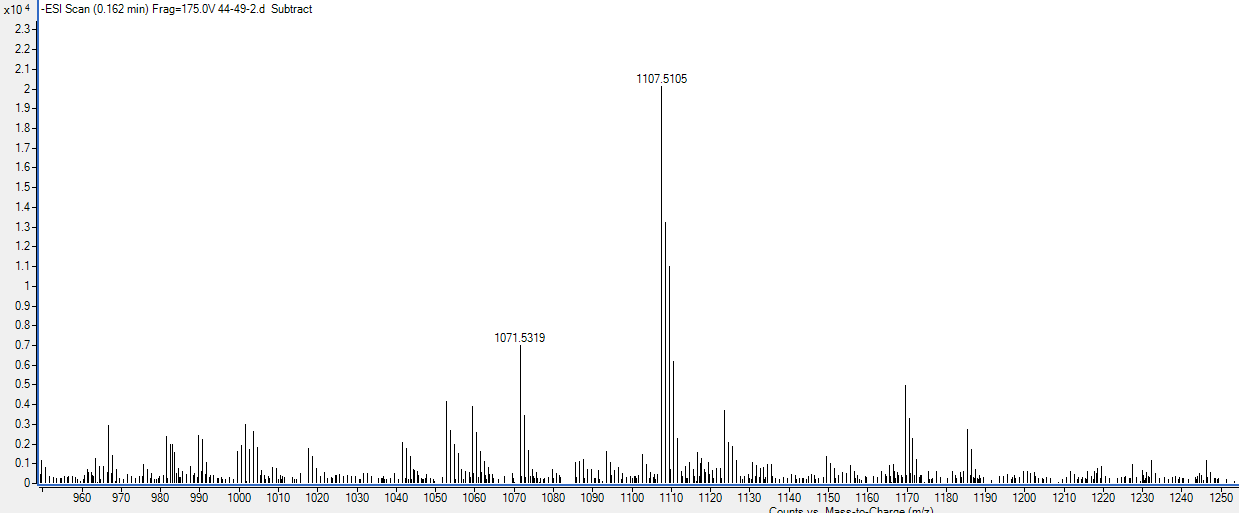


Fig. S14: HR-ESI-MS Spectrum of compound **2**.
